# Supplementary material for: Resveratrol Mediates the Apoptosis of Triple Negative Breast Cancer Cells by Reducing POLD1 Expression
Source: Front Oncol. 2021 Feb 25;11:569295. doi: 10.3389/fonc.2021.569295 (PMC7970754; doi:10.3389/fonc.2021.569295)
Supplement: Supplementary Table 1 — The result of CCK8 detection of cell viability after RSV treatment. [file Table_1.xlsx]

## Sheet: Viability
MCF-10A	RSV(µM)	0（Ctrl）	3.125	6.25	12.5	25	50	100	200
	24h(Cell Viability Rate)	0.991345	0.931994	0.985781	0.974652	0.968161	0.933849	0.869861	0.676971
		0.872643	0.816074	0.861515	0.869861	0.853168	0.858733	0.794745	0.651005
		0.887481	0.822566	0.871716	0.880989	0.852241	0.857805	0.800309	0.655641
		1.09521	1.00989	1.06646	1.05533	1.00804	1.03493	0.949614	0.77898
		1.07017	0.995054	1.03586	1.0442	1.00618	1.0238	0.938485	0.777125
		1.08315	0.998457	0.948402	0.940134	0.978524	0.972347	1.0449	1.28833
	Mean	1	0.929006	0.961622	0.960862	0.944386	0.946911	0.899652	0.804676
	SD	0.0998582	0.0892416	0.0841013	0.0789319	0.0726804	0.0777079	0.0968114	0.243917
	P Value（compare to Ctrl）								0.017
MDA-MB-231	RSV(µM)	0（Ctrl）	3.125	6.25	12.5	25	50	100	200
	24h(Cell Viability Rate)	1.04923	0.987523	0.964421	0.954771	0.940735	0.884589	0.865874	0.858856
		1.02612	0.974949	0.93898	0.939273	0.92202	0.866166	0.85213	0.849206
		1.0346	0.980212	0.945999	0.925821	0.932547	0.867336	0.850375	0.84979
		0.961205	0.922897	0.91003	0.885466	0.87026	0.841602	0.813822	0.75329
		0.958281	0.921142	0.906814	0.861487	0.858563	0.824934	0.793645	0.741008
		0.970562	0.926406	0.912077	0.861195	0.857394	0.827274	0.799786	0.746564
	Mean	1	0.952188	0.92972	0.904669	0.89692	0.851984	0.829272	0.799786
	SD	0.0410247	0.0317443	0.0235737	0.0406902	0.0388931	0.0242899	0.0306104	0.0581056
	P Value（compare to Ctrl）				0.046	0.025	0.001	<0.001	0.002
MCF-10A	RSV(µM)	0（Ctrl）	3.125	6.25	12.5	25	50	100	200
	36h(Cell Viability Rate)	1.00577	1.01072	0.956307	0.842539	0.712284	0.679308	0.666117	0.499588
		1.09975	1.04864	0.95136	0.865622	0.779885	0.804617	0.542457	0.563891
		1.0404	1.00907	0.941467	0.936521	0.774938	0.718879	0.603462	0.542457
		0.977741	0.908491	0.657873	0.781533	0.652927	0.788129	0.893652	0.473207
		0.923331	0.954658	0.860676	0.763397	0.684254	0.728772	0.530915	0.458368
		0.953009	0.949711	0.835944	0.811212	0.73042	0.643034	0.555647	0.535862
	Mean	1	0.980214	0.867271	0.833471	0.722451	0.727123	0.632042	0.512229
	SD	0.0635571	0.0513279	0.114347	0.0629899	0.0500261	0.061895	0.137482	0.0417726
	P Value（compare to Ctrl）			0.006	<0.001	<0.001	<0.001	<0.001	<0.001
MDA-MB-231	RSV(µM)	0（Ctrl）	3.125	6.25	12.5	25	50	100	200
	36h(Cell Viability Rate)	0.935965	0.967457	0.857863	0.689062	0.627336	0.503884	0.377913	0.353979
		1.07453	0.915809	0.888096	0.828889	0.574428	0.453496	0.413185	0.336343
		1.0506	0.908251	0.857863	0.73945	0.556792	0.686542	0.353979	0.34894
		0.981314	0.937224	0.828889	0.759605	0.6097	0.496326	0.386731	0.335083
		1.038	0.949822	0.82511	0.788579	0.60718	0.498845	0.432081	0.367835
		0.919588	0.924627	0.840227	0.765904	0.569389	0.491287	0.411925	0.370355
	Mean	1	0.933865	0.849675	0.761915	0.590804	0.52173	0.395969	0.352089
	SD	0.0639924	0.022189	0.0233879	0.0469682	0.0277251	0.0827445	0.0283887	0.0150481
	P Value（compare to Ctrl）			0.002	0.001	<0.001	0.001	<0.001	<0.001
MCF-10A	RSV(µM)	0（Ctrl）	3.125	6.25	12.5	25	50	100	200
		0.834505	0.788534	0.672796	0.747431	0.587885	0.55219	0.517577	0.44132
	48h(Cell Viability Rate)	0.789075	0.744727	0.640346	0.718767	0.572201	0.533261	0.504056	0.430503
		1.00865	0.949703	0.949703	0.929692	0.838291	0.706328	0.579232	0.431585
		1.17956	1.11357	1.10871	0.979989	0.994592	0.860465	0.664684	0.530557
		1.00649	0.973499	0.976203	0.950784	0.865873	0.745268	0.619794	0.448891
		1.18172	1.13683	1.12169	0.973499	0.976203	0.826933	0.634938	0.522985
	Mean	1	0.951145	0.911574	0.88336	0.805841	0.704074	0.586714	0.46764
	SD	0.165685	0.161502	0.209389	0.118087	0.185148	0.136748	0.0650651	0.0463575
	P Value（compare to Ctrl）							0.027	0.007
MDA-MB-231	RSV(µM)	0（Ctrl）	3.125	6.25	12.5	25	50	100	200
	48h(Cell Viability Rate)	0.976298	0.786767	0.716782	0.536466	0.348927	0.320037	0.258022	0.243825
		0.964842	0.779793	0.710556	0.530489	0.347433	0.31655	0.249554	0.240339
		0.937446	0.818895	0.763854	0.56959	0.353659	0.312565	0.281433	0.269727
		0.926736	0.802955	0.762608	0.562119	0.348927	0.310074	0.278195	0.267486
		1.09933	0.966336	0.853514	0.661243	0.396746	0.389772	0.311818	0.307086
		1.09535	0.964593	0.856253	0.657756	0.391516	0.385538	0.308331	0.301108
	Mean	1	0.853223	0.777261	0.586277	0.364534	0.339089	0.281225	0.271595
	SD	0.0775066	0.0879901	0.0641186	0.0586254	0.0230802	0.037796	0.0253824	0.0279252
	P Value（compare to Ctrl）			0.007	<0.001	<0.001	<0.001	<0.001	<0.001

## Sheet: OD
			RSV（µM）												RSV（µM）												RSV（µM）
MCF-10A		Blank	0(Ctrl)	3.125	6.25	12.5	25	50	100	200				Blank	0	3.125	6.25	12.5	25	50	100	200				Blank	0	3.125	6.25	12.5	25	50	100	200
48h	OD	0.0823333	0.596667	0.568333	0.497	0.543	0.444667	0.422667	0.401333	0.354333		36h	OD	0.2	0.81	0.813	0.78	0.711	0.632	0.612	0.604	0.503		24h	OD	0.0866667	0.443	0.421667	0.441	0.437	0.434667	0.422333	0.399333	0.33
	Relative OD		0.514333	0.486	0.414667	0.460667	0.362333	0.340333	0.319	0.272			Relative OD		0.61	0.613	0.58	0.511	0.432	0.412	0.404	0.303			Relative OD		0.356333	0.335	0.354333	0.350333	0.348	0.335667	0.312667	0.243333
	Cell Viability		0.834505	0.788534	0.672796	0.747431	0.587885	0.55219	0.517577	0.44132			Cell Viability		1.00577	1.01072	0.956307	0.842539	0.712284	0.679308	0.666117	0.499588			Cell Viability		0.991345	0.931994	0.985781	0.974652	0.968161	0.933849	0.869861	0.676971
	OD	0.074	0.560333	0.533	0.468667	0.517	0.426667	0.402667	0.384667	0.339333			OD	0.215	0.882	0.851	0.792	0.74	0.688	0.703	0.544	0.557			OD	0.0706667	0.384333	0.364	0.380333	0.383333	0.377333	0.379333	0.356333	0.304667
	Relative OD		0.486333	0.459	0.394667	0.443	0.352667	0.328667	0.310667	0.265333			Relative OD		0.667	0.636	0.577	0.525	0.473	0.488	0.329	0.342			Relative OD		0.313667	0.293333	0.309667	0.312667	0.306667	0.308667	0.285667	0.234
	Cell Viability		0.789075	0.744727	0.640346	0.718767	0.572201	0.533261	0.504056	0.430503			Cell Viability		1.09975	1.04864	0.95136	0.865622	0.779885	0.804617	0.542457	0.563891			Cell Viability		0.872643	0.816074	0.861515	0.869861	0.853168	0.858733	0.794745	0.651005
	OD	0.064	0.685667	0.649333	0.649333	0.637	0.580667	0.499333	0.421	0.33			OD	0.206	0.837	0.818	0.777	0.774	0.676	0.642	0.572	0.535			OD	0.0616667	0.380667	0.357333	0.375	0.378333	0.368	0.37	0.349333	0.297333
	Relative OD		0.621667	0.585333	0.585333	0.573	0.516667	0.435333	0.357	0.266			Relative OD		0.631	0.612	0.571	0.568	0.47	0.436	0.366	0.329			Relative OD		0.319	0.295667	0.313333	0.316667	0.306333	0.308333	0.287667	0.235667
	Cell Viability		1.00865	0.949703	0.949703	0.929692	0.838291	0.706328	0.579232	0.431585			Cell Viability		1.0404	1.00907	0.941467	0.936521	0.774938	0.718879	0.603462	0.542457			Cell Viability		0.887481	0.822566	0.871716	0.880989	0.852241	0.857805	0.800309	0.655641
	OD	0.0553333	0.782333	0.741667	0.738667	0.659333	0.668333	0.585667	0.465	0.382333			OD	0.259	0.852	0.81	0.658	0.733	0.655	0.737	0.801	0.546			OD	0.0673333	0.461	0.430333	0.450667	0.446667	0.429667	0.439333	0.408667	0.347333
	Relative OD		0.727	0.686333	0.683333	0.604	0.613	0.530333	0.409667	0.327			Relative OD		0.593	0.551	0.399	0.474	0.396	0.478	0.542	0.287			Relative OD		0.393667	0.363	0.383333	0.379333	0.362333	0.372	0.341333	0.28
	Cell Viability		1.17956	1.11357	1.10871	0.979989	0.994592	0.860465	0.664684	0.530557			Cell Viability		0.977741	0.908491	0.657873	0.781533	0.652927	0.788129	0.893652	0.473207			Cell Viability		1.09521	1.00989	1.06646	1.05533	1.00804	1.03493	0.949614	0.77898
	OD	0.0816667	0.702	0.681667	0.683333	0.667667	0.615333	0.541	0.463667	0.358333			OD	0.264	0.824	0.843	0.786	0.727	0.679	0.706	0.586	0.542			OD	0.0653333	0.45	0.423	0.437667	0.440667	0.427	0.433333	0.402667	0.344667
	Relative OD		0.620333	0.6	0.601667	0.586	0.533667	0.459333	0.382	0.276667			Relative OD		0.56	0.579	0.522	0.463	0.415	0.442	0.322	0.278			Relative OD		0.384667	0.357667	0.372333	0.375333	0.361667	0.368	0.337333	0.279333
	Cell Viability		1.00649	0.973499	0.976203	0.950784	0.865873	0.745268	0.619794	0.448891			Cell Viability		0.923331	0.954658	0.860676	0.763397	0.684254	0.728772	0.530915	0.458368			Cell Viability		1.07017	0.995054	1.03586	1.0442	1.00618	1.0238	0.938485	0.777125
	OD	0.035	0.763333	0.735667	0.726333	0.635	0.636667	0.544667	0.426333	0.357333			OD	0.26	0.838	0.836	0.767	0.752	0.703	0.65	0.597	0.585			OD	0.0603333	0.449667	0.420333	0.439333	0.442667	0.427667	0.43	0.404333	0.339333
	Relative OD		0.728333	0.700667	0.691333	0.6	0.601667	0.509667	0.391333	0.322333			Relative OD		0.578	0.576	0.507	0.492	0.443	0.39	0.337	0.325			Relative OD		0.389333	0.36	0.379	0.382333	0.367333	0.369667	0.344	0.279
	Cell Viability		1.18172	1.13683	1.12169	0.973499	0.976203	0.826933	0.634938	0.522985			Cell Viability		0.953009	0.949711	0.835944	0.811212	0.73042	0.643034	0.555647	0.535862			Cell Viability		1.08315	1.00155	1.0544	1.06368	1.02195	1.02844	0.957032	0.776198
		Mean OD of Ctrl	0.616333	0.616333	0.616333	0.616333	0.616333	0.616333	0.616333	0.616333				Mean OD of Ctrl	0.6065	0.6065	0.6065	0.6065	0.6065	0.6065	0.6065	0.6065				Mean OD of Ctrl	0.359444	0.359444	0.359444	0.359444	0.359444	0.359444	0.359444	0.359444
			RSV（µM）												RSV（µM）												RSV（µM）
MDA-MB-231		Blank	0	3.125	6.25	12.5	25	50	100	200		36h		Blank	0	3.125	6.25	12.5	25	50	100	200				Blank	0	3.125	6.25	12.5	25	50	100	200
48h	OD	0.0853333	1.392	1.13833	1.04467	0.803333	0.552333	0.513667	0.430667	0.411667			OD	0.208	0.951	0.976	0.889	0.755	0.706	0.608	0.508	0.489		24h	OD	0.0986667	1.29467	1.22433	1.198	1.187	1.171	1.107	1.08567	1.07767
	Relative OD		1.30667	1.053	0.959333	0.718	0.467	0.428333	0.345333	0.326333			Relative OD		0.743	0.768	0.681	0.547	0.498	0.4	0.3	0.281			Relative OD		1.196	1.12567	1.09933	1.08833	1.07233	1.00833	0.987	0.979
	Cell Viability		0.976298	0.786767	0.716782	0.536466	0.348927	0.320037	0.258022	0.243825			Cell Viability		0.935965	0.967457	0.857863	0.689062	0.627336	0.503884	0.377913	0.353979			Cell Viability		1.04923	0.987523	0.964421	0.954771	0.940735	0.884589	0.865874	0.858856
	OD	0.065	1.35633	1.10867	1.016	0.775	0.53	0.488667	0.399	0.386667			OD	0.196	1.049	0.923	0.901	0.854	0.652	0.556	0.524	0.463			OD	0.0866667	1.25633	1.198	1.157	1.15733	1.13767	1.074	1.058	1.05467
	Relative OD		1.29133	1.04367	0.951	0.71	0.465	0.423667	0.334	0.321667			Relative OD		0.853	0.727	0.705	0.658	0.456	0.36	0.328	0.267			Relative OD		1.16967	1.11133	1.07033	1.07067	1.051	0.987333	0.971333	0.968
	Cell Viability		0.964842	0.779793	0.710556	0.530489	0.347433	0.31655	0.249554	0.240339			Cell Viability		1.07453	0.915809	0.888096	0.828889	0.574428	0.453496	0.413185	0.336343			Cell Viability		1.02612	0.974949	0.93898	0.939273	0.92202	0.866166	0.85213	0.849206
	OD	0.0713333	1.326	1.16733	1.09367	0.833667	0.544667	0.489667	0.448	0.432333			OD	0.209	1.043	0.93	0.89	0.796	0.651	0.754	0.49	0.486			OD	0.0863333	1.26567	1.20367	1.16467	1.14167	1.14933	1.075	1.05567	1.055
	Relative OD		1.25467	1.096	1.02233	0.762333	0.473333	0.418333	0.376667	0.361			Relative OD		0.834	0.721	0.681	0.587	0.442	0.545	0.281	0.277			Relative OD		1.17933	1.11733	1.07833	1.05533	1.063	0.988667	0.969333	0.968667
	Cell Viability		0.937446	0.818895	0.763854	0.56959	0.353659	0.312565	0.281433	0.269727			Cell Viability		1.0506	0.908251	0.857863	0.73945	0.556792	0.686542	0.353979	0.34894			Cell Viability		1.0346	0.980212	0.945999	0.925821	0.932547	0.867336	0.850375	0.84979
	OD	0.0643333	1.30467	1.139	1.085	0.816667	0.531333	0.479333	0.436667	0.422333			OD	0.211	0.99	0.955	0.869	0.814	0.695	0.605	0.518	0.477			OD	0.0896667	1.18533	1.14167	1.127	1.099	1.08167	1.049	1.01733	0.948333
	Relative OD		1.24033	1.07467	1.02067	0.752333	0.467	0.415	0.372333	0.358			Relative OD		0.779	0.744	0.658	0.603	0.484	0.394	0.307	0.266			Relative OD		1.09567	1.052	1.03733	1.00933	0.992	0.959333	0.927667	0.858667
	Cell Viability		0.926736	0.802955	0.762608	0.562119	0.348927	0.310074	0.278195	0.267486			Cell Viability		0.981314	0.937224	0.828889	0.759605	0.6097	0.496326	0.386731	0.335083			Cell Viability		0.961205	0.922897	0.91003	0.885466	0.87026	0.841602	0.813822	0.75329
	OD	0.0773333	1.54867	1.37067	1.21967	0.962333	0.608333	0.599	0.494667	0.488333			OD	0.191	1.015	0.945	0.846	0.817	0.673	0.587	0.534	0.483			OD	0.085	1.17733	1.135	1.11867	1.067	1.06367	1.02533	0.989667	0.929667
	Relative OD		1.47133	1.29333	1.14233	0.885	0.531	0.521667	0.417333	0.411			Relative OD		0.824	0.754	0.655	0.626	0.482	0.396	0.343	0.292			Relative OD		1.09233	1.05	1.03367	0.982	0.978667	0.940333	0.904667	0.844667
	Cell Viability		1.09933	0.966336	0.853514	0.661243	0.396746	0.389772	0.311818	0.307086			Cell Viability		1.038	0.949822	0.82511	0.788579	0.60718	0.498845	0.432081	0.367835			Cell Viability		0.958281	0.921142	0.906814	0.861487	0.858563	0.824934	0.793645	0.741008
	OD	0.069	1.535	1.36	1.215	0.949333	0.593	0.585	0.481667	0.472			OD	0.22	0.95	0.954	0.887	0.828	0.672	0.61	0.547	0.514			OD	0.0776667	1.184	1.13367	1.11733	1.05933	1.055	1.02067	0.989333	0.928667
	Relative OD		1.466	1.291	1.146	0.880333	0.524	0.516	0.412667	0.403			Relative OD		0.73	0.734	0.667	0.608	0.452	0.39	0.327	0.294			Relative OD		1.10633	1.056	1.03967	0.981667	0.977333	0.943	0.911667	0.851
	Cell Viability		1.09535	0.964593	0.856253	0.657756	0.391516	0.385538	0.308331	0.301108			Cell Viability		0.919588	0.924627	0.840227	0.765904	0.569389	0.491287	0.411925	0.370355			Cell Viability		0.970562	0.926406	0.912077	0.861195	0.857394	0.827274	0.799786	0.746564
		Mean OD of Ctrl	1.33839	1.33839	1.33839	1.33839	1.33839	1.33839	1.33839	1.33839				Mean OD of Ctrl	0.793833	0.793833	0.793833	0.793833	0.793833	0.793833	0.793833	0.793833				Mean OD of Ctrl	1.13989	1.13989	1.13989	1.13989	1.13989	1.13989	1.13989	1.13989
Cell Viability			RSV（µM）												RSV（µM）												RSV（µM）
			0	3.125	6.25	12.5	25	50	100	200					0	3.125	6.25	12.5	25	50	100	200					0	3.125	6.25	12.5	25	50	100	200
	48h	10A	0.834505	0.788534	0.672796	0.747431	0.587885	0.55219	0.517577	0.44132				10A	1.00577	1.01072	0.956307	0.842539	0.712284	0.679308	0.666117	0.499588				10A	0.991345	0.931994	0.985781	0.974652	0.968161	0.933849	0.869861	0.676971
			0.789075	0.744727	0.640346	0.718767	0.572201	0.533261	0.504056	0.430503				36h	1.09975	1.04864	0.95136	0.865622	0.779885	0.804617	0.542457	0.563891				24h	0.872643	0.816074	0.861515	0.869861	0.853168	0.858733	0.794745	0.651005
			1.00865	0.949703	0.949703	0.929692	0.838291	0.706328	0.579232	0.431585					1.0404	1.00907	0.941467	0.936521	0.774938	0.718879	0.603462	0.542457					0.887481	0.822566	0.871716	0.880989	0.852241	0.857805	0.800309	0.655641
			1.17956	1.11357	1.10871	0.979989	0.994592	0.860465	0.664684	0.530557					0.977741	0.908491	0.657873	0.781533	0.652927	0.788129	0.893652	0.473207					1.09521	1.00989	1.06646	1.05533	1.00804	1.03493	0.949614	0.77898
			1.00649	0.973499	0.976203	0.950784	0.865873	0.745268	0.619794	0.448891					0.923331	0.954658	0.860676	0.763397	0.684254	0.728772	0.530915	0.458368					1.07017	0.995054	1.03586	1.0442	1.00618	1.0238	0.938485	0.777125
			1.18172	1.13683	1.12169	0.973499	0.976203	0.826933	0.634938	0.522985					0.953009	0.949711	0.835944	0.811212	0.73042	0.643034	0.555647	0.535862					1.08315	0.998457	0.948402	0.940134	0.978524	0.972347	1.0449	1.28833
		Mean	1	0.951145	0.911574	0.88336	0.805841	0.704074	0.586714	0.46764				Mean	1	0.980214	0.867271	0.833471	0.722451	0.727123	0.632042	0.512229				Mean	1	0.929006	0.961622	0.960862	0.944386	0.946911	0.899652	0.804676
		SD	0.165685	0.161502	0.209389	0.118087	0.185148	0.136748	0.0650651	0.0463575				SD	0.0635571	0.0513279	0.114347	0.0629899	0.0500261	0.061895	0.137482	0.0417726				SD	0.0998582	0.0892416	0.0841013	0.0789319	0.0726804	0.0777079	0.0968114	0.243917
			RSV（µM）												RSV（µM）												RSV（µM）
			0	3.125	6.25	12.5	25	50	100	200					0	3.125	6.25	12.5	25	50	100	200					0	3.125	6.25	12.5	25	50	100	200
		MDA-MB-231	0.976298	0.786767	0.716782	0.536466	0.348927	0.320037	0.258022	0.243825				231	0.935965	0.967457	0.857863	0.689062	0.627336	0.503884	0.377913	0.353979				231	1.04923	0.987523	0.964421	0.954771	0.940735	0.884589	0.865874	0.858856
			0.964842	0.779793	0.710556	0.530489	0.347433	0.31655	0.249554	0.240339				36h	1.07453	0.915809	0.888096	0.828889	0.574428	0.453496	0.413185	0.336343				24h	1.02612	0.974949	0.93898	0.939273	0.92202	0.866166	0.85213	0.849206
			0.937446	0.818895	0.763854	0.56959	0.353659	0.312565	0.281433	0.269727					1.0506	0.908251	0.857863	0.73945	0.556792	0.686542	0.353979	0.34894					1.0346	0.980212	0.945999	0.925821	0.932547	0.867336	0.850375	0.84979
			0.926736	0.802955	0.762608	0.562119	0.348927	0.310074	0.278195	0.267486					0.981314	0.937224	0.828889	0.759605	0.6097	0.496326	0.386731	0.335083					0.961205	0.922897	0.91003	0.885466	0.87026	0.841602	0.813822	0.75329
			1.09933	0.966336	0.853514	0.661243	0.396746	0.389772	0.311818	0.307086					1.038	0.949822	0.82511	0.788579	0.60718	0.498845	0.432081	0.367835					0.958281	0.921142	0.906814	0.861487	0.858563	0.824934	0.793645	0.741008
			1.09535	0.964593	0.856253	0.657756	0.391516	0.385538	0.308331	0.301108					0.919588	0.924627	0.840227	0.765904	0.569389	0.491287	0.411925	0.370355					0.970562	0.926406	0.912077	0.861195	0.857394	0.827274	0.799786	0.746564
		Mean	1	0.853223	0.777261	0.586277	0.364534	0.339089	0.281225	0.271595				Mean	1	0.933865	0.849675	0.761915	0.590804	0.52173	0.395969	0.352089				Mean	1	0.952188	0.92972	0.904669	0.89692	0.851984	0.829272	0.799786
		SD	0.0775066	0.0879901	0.0641186	0.0586254	0.0230802	0.037796	0.0253824	0.0279252				SD	0.0639924	0.022189	0.0233879	0.0469682	0.0277251	0.0827445	0.0283887	0.0150481				SD	0.0410247	0.0317443	0.0235737	0.0406902	0.0388931	0.0242899	0.0306104	0.0581056
