# Supplementary material for: Resveratrol Mediates the Apoptosis of Triple Negative Breast Cancer Cells by Reducing POLD1 Expression
Source: Front Oncol. 2021 Feb 25;11:569295. doi: 10.3389/fonc.2021.569295 (PMC7970754; doi:10.3389/fonc.2021.569295)
Supplement: Supplementary Table 2 — Protein expression of PCNA, BCL-2, Cleaved-PARP1 and Cleaved-Caspase3 after RSV treated. [file Table_2.xlsx]

## Sheet: Sheet1
	CO	RSV	内参对齐	内参对齐	CO mean	CO	mean	SD	RSV	mean	SD	P value
GAPDH	19319.5	19542.7
PARP1	17677.8	13803.3	0.915024	0.706315	1.08343	0.844566	1	0.136678	0.651928	0.710956	0.0676976	0.03
	22062.2	16617.7	1.14197	0.850328		1.05403			0.784851
	23053.7	14738.3	1.19329	0.754159		1.1014			0.696088
PCNA	20190.1	15234.3	1.04506	0.779539	1.14566	0.91219	1	0.112972	0.680425	0.55212	0.113794	0.008
	21256.3	10375.7	1.10025	0.530925		0.960361			0.463421
	24954.6	11474.9	1.29168	0.587171		1.12745			0.512515
Bcl-2	23166	11094.9	1.1991	0.567726	1.08405	1.10613	1	0.0919222	0.523708	0.514815	0.130243	0.006
	19862.3	13566.7	1.0281	0.694208		0.948384			0.640384
	19801.6	8057.9	1.02495	0.412323		0.945486			0.380354
CC3	7637	20977.7	0.3953	1.07343	0.307329	1.28625	1	0.248455	3.49277	3.18715	0.295821	0.001
	4988.8	17430.8	0.258226	0.891934		0.840228			2.90222
	5186.5	19017.9	0.268459	0.973146		0.873526			3.16647
