# Supplementary material for: Resveratrol Mediates the Apoptosis of Triple Negative Breast Cancer Cells by Reducing POLD1 Expression
Source: Front Oncol. 2021 Feb 25;11:569295. doi: 10.3389/fonc.2021.569295 (PMC7970754; doi:10.3389/fonc.2021.569295)
Supplement: Supplementary Table 3 — WB and qRT-PCR of POLD1 after RSV treated. [file Table_3.xlsx]

## Sheet: RSV treated POLD1 WBRSV treated
RSV(µM)	Ctrl	DMSO	12.5	25	50	100	200
pold1	14182.7	13637.7	12133.6	11368.9	9877.79	6735.07	5750.01		mean CO
	0.972762	0.950367	0.827653	0.762824	0.700155	0.452042	0.402862		0.905078	0.905078	0.905078	0.905078	0.905078	0.905078	0.905078	0.905078
	1.07478	1.05004	0.914454	0.842826	0.773586	0.499451	0.445113
	12274.1	11652.6	10843.8	9955.3	8948.3	6573	5350.6
	0.841853	0.81203	0.739671	0.667975	0.634271	0.441165	0.374878		0.905078	0.905078	0.905078	0.905078	0.905078	0.905078	0.905078	0.905078
	0.930144	0.897193	0.817245	0.73803	0.700792	0.487433	0.414194
	13130.9	12633.9	11151.7	10024.5	9422.57	6838.46	5551.36
	0.90062	0.880415	0.760675	0.672618	0.667889	0.458981	0.388944		0.905078	0.905078	0.905078	0.905078	0.905078	0.905078	0.905078	0.905078
	0.995074	0.97275	0.840453	0.74316	0.737935	0.507118	0.429735
gapdh	14579.9	14350	14660.3	14903.7	14108	14899.2	14272.9
RSV(µM)	Ctrl	DMSO	12.5	25	50	100	200
Change Fold	1.07478	1.05004	0.914454	0.842826	0.773586	0.499451	0.445113
	0.930144	0.897193	0.817245	0.73803	0.700792	0.487433	0.414194
	0.995074	0.97275	0.840453	0.74316	0.737935	0.507118	0.429735
mean	1	0.973327	0.857384	0.774672	0.737437	0.498	0.42968
SD	0.0724445	0.0764244	0.0507683	0.0590789	0.0363995	0.0099225	0.0154595
P value			0.004	<0.001	<0.001	<0.001	<0.001

## Sheet: RSV-treated POLD1 qRT-PCR
	Ct				△Ct			mean △Ct of Ctrl	△△Ct			2-△△Ct			mean	SD	P value
Ctrl	GAPDH	14.65	14.3467	14.28
	POLD1	24.7	24.04	24.38	10.05	9.69333	10.1	9.94778	0.102222	-0.254444	0.152222	0.931597	1.19288	0.899863	1.00811	0.160795	0.0429829
RSV	GAPDH	11.67	14.2167	14.1
	POLD1	21.93	25.0333	25.1	10.26	10.8167	11	9.94778	0.312222	0.868889	1.05222	0.8054	0.547568	0.482225	0.611731	0.170875
