# Supplementary material for: Resveratrol Mediates the Apoptosis of Triple Negative Breast Cancer Cells by Reducing POLD1 Expression
Source: Front Oncol. 2021 Feb 25;11:569295. doi: 10.3389/fonc.2021.569295 (PMC7970754; doi:10.3389/fonc.2021.569295)
Supplement: Supplementary Table 4 — Protein expression and mRNA expression of POLD overexpression. [file Table_4.xlsx]

## Sheet: POLD1-oe mRNA
	Ct				△Ct			mean △Ct of Ctrl	△△Ct			2-△△Ct			mean	SD	P value
Ctrl	GAPDH	15.91	15.53	16.47
	POLD1	27.98	28.36	27.73	12.07	12.83	11.26	12.0533	0.0166667	0.776667	-0.793333	0.988514	0.583714	1.73307	1.10177	0.58299	<0.001
VECTOR	GAPDH	17.15	15.51	16.86
	POLD1	27.84	28.42	27.7	10.69	12.91	10.84	12.0533	-1.36333	0.856667	-1.21333	2.57279	0.552227	2.31873	1.81458	1.10059	<0.001
POLD-OE	GAPDH	15.27	14.21	15.39
	POLD1	21.35	20.23	21.61	6.08	6.02	6.22	12.0533	-5.97333	-6.03333	-5.83333	62.8279	65.4959	57.0175	61.7804	4.33517

## Sheet: POLD1-oe protien
		CO	NC	POLD1-OE			CO	NC	POLD1-OE
POLD1	gray value	8293.7	9301.5	16799.2		relative gray value	0.700221	0.813594	1.40729
	relative gray value	0.700221	0.813594	1.40729	mean co relative gray value		1.20388	1.27767	2.14034
	gray value	14259.2	14607.1	25549.9	1.08622		1.35456	1.43463	2.45039
	relative gray value	1.20388	1.27767	2.14034		Change Folds	0.64464	0.749014	1.29558
	gray value	16044	16401.6	29251.1			1.10832	1.17625	1.97045
	relative gray value	1.35456	1.43463	2.45039			1.24704	1.32076	2.25589
						mean	1	1.08201	1.84064
GAPDH	gray value	11844.4	11432.6	11937.3		SD	0.315471	0.297295	0.493139	P (CO：NC）	P (CO：POLD1）
										0.818	0.035
											P (NC：POLD1)
											0.048
